# Supplementary material for: Thermodynamics regulated organic hydride/acid pairs as novel organic hydrogen reductants
Source: Royal Society of Chemistry journal article supplement (doi:10.1039/d2qo01605b), 2022-01-01
Supplement: d2qo01605b1.pdf [file d2qo01605b1.pdf]

*Supporting Information for*

**Thermodynamics regulated organic hydride/acid pairs as novel  
organic hydrogen reductants**

Guang-Bin Shen,<sup>‡,\*</sup> Bao-Chen Qian,<sup>‡</sup> Gao-Shuai, Zhang,<sup>‡</sup> Guang-Ze Luo,<sup>‡</sup> Yan-Hua  
Fu,<sup>§,\*</sup> and Xiao-Qing Zhu,<sup>†,\*</sup>

<sup>‡</sup>*School of Medical Engineering, Jining Medical University, Jining, Shandong, 272000, P. R.  
China.*

<sup>§</sup>*College of Chemistry and Environmental Engineering, Anyang Institute of Technology, Anyang,  
Henan, 455000, China*

<sup>†</sup>*The State Key Laboratory of Elemento-Organic Chemistry, Department of Chemistry, Nankai  
University, Tianjin 300071, China*

*\*E-mail: gbshen@mail.jnmc.edu.cn; 20180031@ayit.edu.cn; xqzhu@nankai.edu.cn;*

Contents

|                  |    |
|------------------|----|
| Table S1 .....   | S2 |
| References ..... | S7 |

**Table S1.** The Gibbs free energies changes of XH releasing hydrides [ $\Delta G_{\text{H-D}}(\text{XH})$ ], the Gibbs free energies of XH/HClO<sub>4</sub> pairs releasing two hydrogen ions [ $\Delta G_{\text{PH}}(\text{XH}/\text{HClO}_4)$ ], the Gibbs free energies of XH/PhOH pairs releasing two hydrogen ions [ $\Delta G_{\text{PH}}(\text{XH}/\text{PhOH})$ ], the Gibbs free energies of XH/TsOH pairs releasing two hydrogen ions [ $\Delta G_{\text{PH}}(\text{XH}/\text{TsOH})$ ], the pK<sub>a</sub> of HB<sub>S</sub> [pK<sub>a</sub>(HB<sub>S</sub>)] to make XH/HB<sub>S</sub> pairs be the thermodynamically equivalent organic hydrogen reductants of HEH

| XH  | G or R                      | $\Delta G_{\text{H-D}}(\text{XH})^{S1,a}$ | $\Delta G_{\text{PH}}(\text{XH}/\text{HClO}_4)^b$ | $\Delta G_{\text{PH}}(\text{XH}/\text{PhOH})^c$ | $\Delta G_{\text{PH}}(\text{XH}/\text{TsOH})^d$ | pK <sub>a</sub> (HB <sub>S</sub> ) <sup>e</sup> |
|-----|-----------------------------|-------------------------------------------|---------------------------------------------------|-------------------------------------------------|-------------------------------------------------|-------------------------------------------------|
| 1H  | <i>p</i> -CH <sub>3</sub> O | 61.9 <sup>S2</sup>                        | 60.9                                              | 101.9                                           | 73.5                                            | 15.5                                            |
| 2H  | <i>p</i> -CH <sub>3</sub>   | 63.0 <sup>S2</sup>                        | 62.0                                              | 103.0                                           | 74.6                                            | 14.7                                            |
| 3H  | <i>p</i> -H                 | 64.6 <sup>S2</sup>                        | 63.6                                              | 104.6                                           | 76.2                                            | 13.5                                            |
| 4H  | <i>p</i> -Cl                | 66.4 <sup>S2</sup>                        | 65.4                                              | 106.4                                           | 78.0                                            | 12.2                                            |
| 5H  | <i>p</i> -Br                | 66.0 <sup>S2</sup>                        | 65.0                                              | 106.0                                           | 77.6                                            | 12.5                                            |
| 6H  | <i>p</i> -CH <sub>3</sub> O | 63.4 <sup>S2</sup>                        | 62.4                                              | 103.4                                           | 75.0                                            | 14.4                                            |
| 7H  | <i>p</i> -CH <sub>3</sub>   | 64.5 <sup>S2</sup>                        | 63.5                                              | 104.5                                           | 76.1                                            | 13.6                                            |
| 8H  | <i>p</i> -H                 | 66.1 <sup>S2</sup>                        | 65.1                                              | 106.1                                           | 77.7                                            | 12.4                                            |
| 9H  | <i>p</i> -Cl                | 67.6 <sup>S2</sup>                        | 66.6                                              | 107.6                                           | 79.2                                            | 11.3                                            |
| 10H | <i>p</i> -Br                | 67.3 <sup>S2</sup>                        | 66.3                                              | 107.3                                           | 78.9                                            | 11.5                                            |
| 11H | <i>p</i> -CF <sub>3</sub>   | 67.7 <sup>S2</sup>                        | 66.7                                              | 107.7                                           | 79.3                                            | 11.2                                            |
| 12H | <i>p</i> -CH <sub>3</sub> O | 58.2 <sup>S3</sup>                        | 57.2                                              | 98.2                                            | 69.8                                            | 18.2                                            |
| 13H | <i>p</i> -CH <sub>3</sub>   | 58.7 <sup>S3</sup>                        | 57.7                                              | 98.7                                            | 70.3                                            | 17.8                                            |
| 14H | <i>p</i> -F                 | 59.4 <sup>S3</sup>                        | 58.4                                              | 99.4                                            | 71.0                                            | 17.3                                            |
| 15H | <i>p</i> -Cl                | 60.1 <sup>S3</sup>                        | 59.1                                              | 100.1                                           | 71.7                                            | 16.8                                            |
| 16H | <i>p</i> -CN                | 61.4 <sup>S3</sup>                        | 60.4                                              | 101.4                                           | 73.0                                            | 15.8                                            |
| 17H | -                           | 59.3 <sup>S2</sup>                        | 58.3                                              | 99.3                                            | 70.9                                            | 17.4                                            |
| 18H | -                           | 69.7 <sup>S4</sup>                        | 68.7                                              | 109.7                                           | 81.3                                            | 9.8                                             |
| 19H | <i>p</i> -CH <sub>3</sub> O | 61.3 <sup>S3</sup>                        | 60.3                                              | 101.3                                           | 72.9                                            | 15.9                                            |
| 20H | <i>p</i> -CH <sub>3</sub>   | 61.6 <sup>S3</sup>                        | 60.6                                              | 101.6                                           | 73.2                                            | 15.7                                            |
| 21H | <i>p</i> -H                 | 62.2 <sup>S3</sup>                        | 61.2                                              | 102.2                                           | 73.8                                            | 15.3                                            |
| 22H | <i>p</i> -F                 | 62.3 <sup>S3</sup>                        | 61.3                                              | 102.3                                           | 73.9                                            | 15.2                                            |
| 23H | <i>p</i> -Cl                | 62.7 <sup>S3</sup>                        | 61.7                                              | 102.7                                           | 74.3                                            | 14.9                                            |
| 24H | <i>p</i> -CN                | 64.1 <sup>S3</sup>                        | 63.1                                              | 104.1                                           | 75.7                                            | 13.9                                            |
| 25H | <i>p</i> -CH <sub>3</sub> O | 60.0 <sup>S3</sup>                        | 59.0                                              | 100.0                                           | 71.6                                            | 16.9                                            |
| 26H | <i>p</i> -CH <sub>3</sub>   | 60.3 <sup>S3</sup>                        | 59.3                                              | 100.3                                           | 71.9                                            | 16.6                                            |
| 27H | <i>p</i> -H                 | 60.9 <sup>S3</sup>                        | 59.9                                              | 100.9                                           | 72.5                                            | 16.2                                            |
| 28H | <i>p</i> -F                 | 61.0 <sup>S3</sup>                        | 60.0                                              | 101.0                                           | 72.6                                            | 16.1                                            |
| 29H | <i>p</i> -Cl                | 61.7 <sup>S3</sup>                        | 60.7                                              | 101.7                                           | 73.3                                            | 15.6                                            |
| 30H | <i>p</i> -CN                | 63.0 <sup>S3</sup>                        | 62.0                                              | 103.0                                           | 74.6                                            | 14.7                                            |
| 31H | <i>p</i> -CH <sub>3</sub> O | 64.8 <sup>S3</sup>                        | 63.8                                              | 104.8                                           | 76.4                                            | 13.4                                            |
| 32H | <i>p</i> -CH <sub>3</sub>   | 65.2 <sup>S3</sup>                        | 64.2                                              | 105.2                                           | 76.8                                            | 13.1                                            |
| 33H | <i>p</i> -H                 | 65.6 <sup>S3</sup>                        | 64.6                                              | 105.6                                           | 77.2                                            | 12.8                                            |
| 34H | <i>p</i> -F                 | 65.7 <sup>S3</sup>                        | 64.7                                              | 105.7                                           | 77.3                                            | 12.7                                            |
| 35H | <i>p</i> -CN                | 67.7 <sup>S3</sup>                        | 66.7                                              | 107.7                                           | 79.3                                            | 11.2                                            |
| 36H | <i>p</i> -CH <sub>3</sub> O | 65.3 <sup>S3</sup>                        | 64.3                                              | 105.3                                           | 76.9                                            | 13.0                                            |
| 37H | <i>p</i> -CH <sub>3</sub>   | 65.7 <sup>S3</sup>                        | 64.7                                              | 105.7                                           | 77.3                                            | 12.7                                            |

| XH  | G or R                      | $\Delta G_{\text{H-D}}$<br>(XH) <sup>SI,a</sup> | $\Delta G_{\text{PH-}}$<br>(XH/HClO <sub>4</sub> ) <sup>b</sup> | $\Delta G_{\text{PH-}}$<br>(XH/PhOH) <sup>c</sup> | $\Delta G_{\text{PH-}}$<br>(XH/TsOH)<br><sub>d</sub> | pK <sub>a</sub> (HB <sub>S</sub> ) <sup>e</sup> |
|-----|-----------------------------|-------------------------------------------------|-----------------------------------------------------------------|---------------------------------------------------|------------------------------------------------------|-------------------------------------------------|
| 38H | <i>p</i> -H                 | 66.4 <sup>S3</sup>                              | 65.4                                                            | 106.4                                             | 78.0                                                 | 12.2                                            |
| 39H | <i>p</i> -F                 | 66.5 <sup>S3</sup>                              | 65.5                                                            | 106.5                                             | 78.1                                                 | 12.1                                            |
| 40H | <i>p</i> -Cl                | 67.5 <sup>S3</sup>                              | 66.5                                                            | 107.5                                             | 79.1                                                 | 11.4                                            |
| 41H | <i>p</i> -CN                | 69.0 <sup>S3</sup>                              | 68.0                                                            | 109.0                                             | 80.6                                                 | 10.3                                            |
| 42H | -                           | 62.6 <sup>S3</sup>                              | 61.6                                                            | 102.6                                             | 74.2                                                 | 15.0                                            |
| 43H | -                           | 58.9 <sup>S3</sup>                              | 57.9                                                            | 98.9                                              | 70.5                                                 | 17.7                                            |
| 44H | -                           | 61.0 <sup>S3</sup>                              | 60.0                                                            | 101.0                                             | 72.6                                                 | 16.1                                            |
| 45H | -                           | 48.1 <sup>S3</sup>                              | 47.1                                                            | 88.1                                              | 59.7                                                 | 25.5                                            |
| 46H | -                           | 43.1 <sup>S3</sup>                              | 42.1                                                            | 83.1                                              | 54.7                                                 | 29.2                                            |
| 47H | -                           | 56.6 <sup>S3</sup>                              | 55.6                                                            | 96.6                                              | 68.2                                                 | 19.3                                            |
| 48H | -                           | 63.3 <sup>S3</sup>                              | 62.3                                                            | 103.3                                             | 74.9                                                 | 14.5                                            |
| 49H | CH <sub>3</sub>             | 55.8 <sup>S3</sup>                              | 54.8                                                            | 95.8                                              | 67.4                                                 | 19.9                                            |
| 50H | Et                          | 56.6 <sup>S3</sup>                              | 55.6                                                            | 96.6                                              | 68.2                                                 | 19.3                                            |
| 51H | <i>pr</i>                   | 55.9 <sup>S3</sup>                              | 54.9                                                            | 95.9                                              | 67.5                                                 | 19.9                                            |
| 52H | <i>i-pr</i>                 | 56.4 <sup>S3</sup>                              | 55.4                                                            | 96.4                                              | 68.0                                                 | 19.5                                            |
| 53H | <i>n</i> -Bu                | 56.5 <sup>S3</sup>                              | 55.5                                                            | 96.5                                              | 68.1                                                 | 19.4                                            |
| 54H | <i>p</i> -CH <sub>3</sub> O | 63.5 <sup>S5</sup>                              | 62.5                                                            | 103.5                                             | 75.1                                                 | 14.3                                            |
| 55H | <i>p</i> -CH <sub>3</sub>   | 64.0 <sup>S5</sup>                              | 63.0                                                            | 104.0                                             | 75.6                                                 | 13.9                                            |
| 56H | <i>p</i> -H                 | 64.6 <sup>S5</sup>                              | 63.6                                                            | 104.6                                             | 76.2                                                 | 13.5                                            |
| 57H | <i>p</i> -Br                | 65.2 <sup>S5</sup>                              | 64.2                                                            | 105.2                                             | 76.8                                                 | 13.1                                            |
| 58H | <i>p</i> -CN                | 66.4 <sup>S5</sup>                              | 65.4                                                            | 106.4                                             | 78.0                                                 | 12.2                                            |
| 59H | <i>p</i> -CH <sub>3</sub> O | 63.3 <sup>S5</sup>                              | 62.3                                                            | 103.3                                             | 74.9                                                 | 14.5                                            |
| 60H | <i>p</i> -CH <sub>3</sub>   | 63.7 <sup>S5</sup>                              | 62.7                                                            | 103.7                                             | 75.3                                                 | 14.2                                            |
| 61H | <i>p</i> -H                 | 64.2 <sup>S5</sup>                              | 63.2                                                            | 104.2                                             | 75.8                                                 | 13.8                                            |
| 62H | <i>p</i> -Br                | 64.9 <sup>S5</sup>                              | 63.9                                                            | 104.9                                             | 76.5                                                 | 13.3                                            |
| 63H | <i>p</i> -CN                | 66.1 <sup>S5</sup>                              | 65.1                                                            | 106.1                                             | 77.7                                                 | 12.4                                            |
| 64H | <i>p</i> -CH <sub>3</sub> O | 62.6 <sup>S5</sup>                              | 61.6                                                            | 102.6                                             | 74.2                                                 | 15.0                                            |
| 65H | <i>p</i> -CH <sub>3</sub>   | 63.0 <sup>S5</sup>                              | 62.0                                                            | 103.0                                             | 74.6                                                 | 14.7                                            |
| 66H | <i>p</i> -H                 | 63.6 <sup>S5</sup>                              | 62.6                                                            | 103.6                                             | 75.2                                                 | 14.2                                            |
| 67H | <i>p</i> -Br                | 64.2 <sup>S5</sup>                              | 63.2                                                            | 104.2                                             | 75.8                                                 | 13.8                                            |
| 68H | <i>p</i> -CN                | 65.5 <sup>S5</sup>                              | 64.5                                                            | 105.5                                             | 77.1                                                 | 12.8                                            |
| 69H | <i>p</i> -CH <sub>3</sub> O | 65.9 <sup>S5</sup>                              | 64.9                                                            | 105.9                                             | 77.5                                                 | 12.6                                            |
| 70H | <i>p</i> -CH <sub>3</sub>   | 66.4 <sup>S5</sup>                              | 65.4                                                            | 106.4                                             | 78.0                                                 | 12.2                                            |
| 71H | <i>p</i> -H                 | 66.7 <sup>S5</sup>                              | 65.7                                                            | 106.7                                             | 78.3                                                 | 12.0                                            |
| 72H | <i>p</i> -Br                | 67.2 <sup>S5</sup>                              | 66.2                                                            | 107.2                                             | 78.8                                                 | 11.6                                            |
| 73H | <i>p</i> -CN                | 68.0 <sup>S5</sup>                              | 67.0                                                            | 108.0                                             | 79.6                                                 | 11.0                                            |
| 74H | -                           | 66.4 <sup>S5</sup>                              | 65.4                                                            | 106.4                                             | 78.0                                                 | 12.2                                            |
| 75H | Bz                          | 65.3 <sup>S5</sup>                              | 64.3                                                            | 105.3                                             | 76.9                                                 | 13.0                                            |
| 76H | CH <sub>3</sub>             | 61.6 <sup>S5</sup>                              | 60.6                                                            | 101.6                                             | 73.2                                                 | 15.7                                            |
| 77H | -                           | 78.0 <sup>S5</sup>                              | 77.0                                                            | 118.0                                             | 89.6                                                 | 3.7                                             |
| 78H | -                           | 65.0 <sup>S6</sup>                              | 64.0                                                            | 105.0                                             | 76.6                                                 | 13.2                                            |
| 79H | -                           | 64.4 <sup>S7</sup>                              | 63.4                                                            | 104.4                                             | 76.0                                                 | 13.6                                            |

| XH   | G or R                                     | $\Delta G_{\text{H-D}}$<br>(XH) <sup>SI,a</sup> | $\Delta G_{\text{PH-}}$<br>(XH/HClO <sub>4</sub> ) <sup>b</sup> | $\Delta G_{\text{PH-}}$<br>(XH/PhOH) <sup>c</sup> | $\Delta G_{\text{PH-}}$<br>(XH/TsOH)<br><sub>d</sub> | pK <sub>a</sub> (HB <sub>S</sub> ) <sup>e</sup> |
|------|--------------------------------------------|-------------------------------------------------|-----------------------------------------------------------------|---------------------------------------------------|------------------------------------------------------|-------------------------------------------------|
| 80H  | -                                          | 44.6 <sup>SS</sup>                              | 43.6                                                            | 84.6                                              | 56.2                                                 | 28.1                                            |
| 81H  | (CH <sub>3</sub> O, H)                     | 44.8 <sup>SS</sup>                              | 43.8                                                            | 84.8                                              | 56.4                                                 | 28.0                                            |
| 82H  | (CH <sub>3</sub> , H)                      | 46.1 <sup>SS</sup>                              | 45.1                                                            | 86.1                                              | 57.7                                                 | 27.0                                            |
| 83H  | (Cl, H)                                    | 53.3 <sup>SS</sup>                              | 52.3                                                            | 93.3                                              | 64.9                                                 | 21.8                                            |
| 84H  | (CF <sub>3</sub> , H)                      | 57.0 <sup>SS</sup>                              | 56.0                                                            | 97.0                                              | 68.6                                                 | 19.1                                            |
| 85H  | (CH <sub>3</sub> , CH <sub>3</sub> )       | 44.1 <sup>SS</sup>                              | 43.1                                                            | 84.1                                              | 55.7                                                 | 28.5                                            |
| 86H  | <i>p</i> -N(CH <sub>3</sub> ) <sub>2</sub> | 45.7 <sup>SS</sup>                              | 44.7                                                            | 85.7                                              | 57.3                                                 | 27.3                                            |
| 87H  | <i>p</i> -OH                               | 47.7 <sup>SS</sup>                              | 46.7                                                            | 87.7                                              | 59.3                                                 | 25.8                                            |
| 88H  | <i>p</i> -CH <sub>3</sub> O                | 48.0 <sup>SS</sup>                              | 47.0                                                            | 88.0                                              | 59.6                                                 | 25.6                                            |
| 89H  | <i>p</i> -CH <sub>3</sub>                  | 48.5 <sup>SS</sup>                              | 47.5                                                            | 88.5                                              | 60.1                                                 | 25.3                                            |
| 90H  | <i>p</i> -H                                | 49.2 <sup>SS</sup>                              | 48.2                                                            | 89.2                                              | 60.8                                                 | 24.7                                            |
| 91H  | <i>p</i> -Cl                               | 50.3 <sup>SS</sup>                              | 49.3                                                            | 90.3                                              | 61.9                                                 | 23.9                                            |
| 92H  | <i>p</i> -Br                               | 50.3 <sup>SS</sup>                              | 49.3                                                            | 90.3                                              | 61.9                                                 | 23.9                                            |
| 93H  | <i>p</i> -CF <sub>3</sub>                  | 51.6 <sup>SS</sup>                              | 50.6                                                            | 91.6                                              | 63.2                                                 | 23.0                                            |
| 94H  | <i>p</i> -CN                               | 51.8 <sup>SS</sup>                              | 50.8                                                            | 91.8                                              | 63.4                                                 | 22.8                                            |
| 95H  | <i>p</i> -NO <sub>2</sub>                  | 52.2 <sup>SS</sup>                              | 51.2                                                            | 92.2                                              | 63.8                                                 | 22.6                                            |
| 96H  | <i>m</i> -CH <sub>3</sub> O                | 49.7 <sup>SS</sup>                              | 48.7                                                            | 89.7                                              | 61.3                                                 | 24.4                                            |
| 97H  | <i>m</i> -CH <sub>3</sub>                  | 48.9 <sup>SS</sup>                              | 47.9                                                            | 88.9                                              | 60.5                                                 | 25.0                                            |
| 98H  | <i>m</i> -Cl                               | 50.7 <sup>SS</sup>                              | 49.7                                                            | 90.7                                              | 62.3                                                 | 23.6                                            |
| 99H  | <i>m</i> -Br                               | 50.8 <sup>SS</sup>                              | 49.8                                                            | 90.8                                              | 62.4                                                 | 23.6                                            |
| 100H | <i>m</i> -NO <sub>2</sub>                  | 52.0 <sup>SS</sup>                              | 51.0                                                            | 92.0                                              | 63.6                                                 | 22.7                                            |
| 101H | <i>o</i> -CH <sub>3</sub>                  | 46.5 <sup>SS</sup>                              | 45.5                                                            | 86.5                                              | 58.1                                                 | 26.7                                            |
| 102H | <i>o</i> -Cl                               | 48.3 <sup>SS</sup>                              | 47.3                                                            | 88.3                                              | 59.9                                                 | 25.4                                            |
| 103H | <i>o</i> -OH                               | 48.9 <sup>SS</sup>                              | 47.9                                                            | 88.9                                              | 60.5                                                 | 25.0                                            |
| 104H | (NO <sub>2</sub> , CH <sub>3</sub> O)      | 51.0 <sup>SS</sup>                              | 50.0                                                            | 91.0                                              | 62.6                                                 | 23.4                                            |
| 105H | (Br, CH <sub>3</sub> O)                    | 49.7 <sup>SS</sup>                              | 48.7                                                            | 89.7                                              | 61.3                                                 | 24.4                                            |
| 106H | (CH <sub>3</sub> O, CH <sub>3</sub> O)     | 48.6 <sup>SS</sup>                              | 47.6                                                            | 88.6                                              | 60.2                                                 | 25.2                                            |
| 107H | (CH <sub>3</sub> , CH <sub>3</sub> )       | 48.2 <sup>SS</sup>                              | 47.2                                                            | 88.2                                              | 59.8                                                 | 25.5                                            |
| 108H | (F, F)                                     | 50.8 <sup>SS</sup>                              | 49.8                                                            | 90.8                                              | 62.4                                                 | 23.6                                            |
| 109H | (Br, F)                                    | 51.1 <sup>SS</sup>                              | 50.1                                                            | 91.1                                              | 62.7                                                 | 23.4                                            |
| 110H | (F, Cl)                                    | 51.5 <sup>SS</sup>                              | 50.5                                                            | 91.5                                              | 63.1                                                 | 23.1                                            |
| 111H | (Cl, Cl)                                   | 51.7 <sup>SS</sup>                              | 50.7                                                            | 91.7                                              | 63.3                                                 | 22.9                                            |
| 112H | -                                          | 49.1 <sup>SS</sup>                              | 48.1                                                            | 89.1                                              | 60.7                                                 | 24.8                                            |
| 113H | <i>p</i> -CH <sub>3</sub> O                | 65.0 <sup>SS</sup>                              | 64.0                                                            | 105.0                                             | 76.6                                                 | 13.2                                            |
| 114H | <i>p</i> -CH <sub>3</sub>                  | 66.1 <sup>SS</sup>                              | 65.1                                                            | 106.1                                             | 77.7                                                 | 12.4                                            |
| 115H | <i>p</i> -H                                | 68.1 <sup>SS</sup>                              | 67.1                                                            | 108.1                                             | 79.7                                                 | 10.9                                            |
| 116H | <i>p</i> -F                                | 68.8 <sup>SS</sup>                              | 67.8                                                            | 108.8                                             | 80.4                                                 | 10.4                                            |
| 117H | <i>p</i> -Cl                               | 70.7 <sup>SS</sup>                              | 69.7                                                            | 110.7                                             | 82.3                                                 | 9.1                                             |
| 118H | <i>p</i> -Br                               | 70.8 <sup>SS</sup>                              | 69.8                                                            | 110.8                                             | 82.4                                                 | 9.0                                             |
| 119H | <i>m</i> -CH <sub>3</sub> O                | 69.5 <sup>SS</sup>                              | 68.5                                                            | 109.5                                             | 81.1                                                 | 9.9                                             |
| 120H | <i>m</i> -CH <sub>3</sub>                  | 67.2 <sup>SS</sup>                              | 66.2                                                            | 107.2                                             | 78.8                                                 | 11.6                                            |
| 121H | <i>m</i> -Cl                               | 72.0 <sup>SS</sup>                              | 71.0                                                            | 112.0                                             | 83.6                                                 | 8.1                                             |

| XH   | G or R                      | $\Delta G_{\text{H-D}}(\text{XH})^{\text{SI},a}$ | $\Delta G_{\text{PH-}}(\text{XH}/\text{HClO}_4)^b$ | $\Delta G_{\text{PH-}}(\text{XH}/\text{PhOH})^c$ | $\Delta G_{\text{PH-}}(\text{XH}/\text{TsOH})^d$ | $\text{p}K_{\text{a}}(\text{HB}_8)^e$ |
|------|-----------------------------|--------------------------------------------------|----------------------------------------------------|--------------------------------------------------|--------------------------------------------------|---------------------------------------|
| 122H | -                           | 52.7 <sup>S9</sup>                               | 51.7                                               | 92.7                                             | 64.3                                             | 22.2                                  |
| 123H | <i>p</i> -CH <sub>3</sub> O | 83.4 <sup>S8</sup>                               | 82.4                                               | 123.4                                            | 95.0                                             | -0.2                                  |
| 124H | <i>p</i> -CH <sub>3</sub>   | 84.4 <sup>S8</sup>                               | 83.4                                               | 124.4                                            | 96.0                                             | -0.9                                  |
| 125H | <i>p</i> -H                 | 86.3 <sup>S8</sup>                               | 85.3                                               | 126.3                                            | 97.9                                             | -2.3                                  |
| 126H | <i>p</i> -Cl                | 88.5 <sup>S8</sup>                               | 87.5                                               | 128.5                                            | 100.1                                            | -3.9                                  |
| 127H | <i>p</i> -Br                | 88.3 <sup>S8</sup>                               | 87.3                                               | 128.3                                            | 99.9                                             | -3.8                                  |
| 128H | -                           | 48.8 <sup>S10</sup>                              | 47.8                                               | 88.8                                             | 60.4                                             | 25.0                                  |
| 129H | -                           | 50.8 <sup>S10</sup>                              | 49.8                                               | 90.8                                             | 62.4                                             | 23.6                                  |
| 130H | -                           | 52.7 <sup>S10</sup>                              | 51.7                                               | 92.7                                             | 64.3                                             | 22.2                                  |
| 131H | -                           | 50.2 <sup>S10</sup>                              | 49.2                                               | 90.2                                             | 61.8                                             | 24.0                                  |
| 132H | <i>p</i> -CH <sub>3</sub> O | 52.9 <sup>S10</sup>                              | 51.9                                               | 92.9                                             | 64.5                                             | 22.0                                  |
| 133H | <i>p</i> -CH <sub>3</sub>   | 53.2 <sup>S10</sup>                              | 52.2                                               | 93.2                                             | 64.8                                             | 21.8                                  |
| 134H | <i>p</i> -H                 | 53.7 <sup>S10</sup>                              | 52.7                                               | 93.7                                             | 65.3                                             | 21.5                                  |
| 135H | <i>p</i> -Br                | 54.5 <sup>S10</sup>                              | 53.5                                               | 94.5                                             | 66.1                                             | 20.9                                  |
| 136H | <i>p</i> -CF <sub>3</sub>   | 55.5 <sup>S10</sup>                              | 54.5                                               | 95.5                                             | 67.1                                             | 20.1                                  |
| 137H | <i>m</i> -CH <sub>3</sub> O | 54.2 <sup>S10</sup>                              | 53.2                                               | 94.2                                             | 65.8                                             | 21.1                                  |
| 138H | <i>m</i> -CH <sub>3</sub>   | 53.5 <sup>S10</sup>                              | 52.5                                               | 93.5                                             | 65.1                                             | 21.6                                  |
| 139H | <i>m</i> -Br                | 55.0 <sup>S10</sup>                              | 54.0                                               | 95.0                                             | 66.6                                             | 20.5                                  |
| 140H | <i>m</i> -CF <sub>3</sub>   | 55.2 <sup>S10</sup>                              | 54.2                                               | 95.2                                             | 66.8                                             | 20.4                                  |
| 141H | -                           | 55.7 <sup>S10</sup>                              | 54.7                                               | 95.7                                             | 67.3                                             | 20.0                                  |
| 142H | <i>p</i> -CH <sub>3</sub> O | 79.8 <sup>S10</sup>                              | 78.8                                               | 119.8                                            | 91.4                                             | 2.4                                   |
| 143H | <i>p</i> -CH <sub>3</sub>   | 80.4 <sup>S10</sup>                              | 79.4                                               | 120.4                                            | 92.0                                             | 2.0                                   |
| 144H | <i>p</i> -H                 | 81.5 <sup>S10</sup>                              | 80.5                                               | 121.5                                            | 93.1                                             | 1.2                                   |
| 145H | <i>p</i> -Cl                | 83.1 <sup>S10</sup>                              | 82.1                                               | 123.1                                            | 94.7                                             | 0.0                                   |
| 146H | <i>p</i> -CF <sub>3</sub>   | 84.9 <sup>S10</sup>                              | 83.9                                               | 124.9                                            | 96.5                                             | -1.3                                  |
| 147H | <i>p</i> -CH <sub>3</sub> O | 70.1 <sup>S11</sup>                              | 69.1                                               | 110.1                                            | 81.7                                             | 9.5                                   |
| 148H | <i>p</i> -CH <sub>3</sub>   | 70.2 <sup>S11</sup>                              | 69.2                                               | 110.2                                            | 81.8                                             | 9.4                                   |
| 149H | <i>p</i> -H                 | 70.5 <sup>S11</sup>                              | 69.5                                               | 110.5                                            | 82.1                                             | 9.2                                   |
| 150H | <i>p</i> -Cl                | 70.8 <sup>S11</sup>                              | 69.8                                               | 110.8                                            | 82.4                                             | 9.0                                   |
| 151H | <i>p</i> -NO <sub>2</sub>   | 71.6 <sup>S11</sup>                              | 70.6                                               | 111.6                                            | 83.2                                             | 8.4                                   |
| 152H | <i>p</i> -CH <sub>3</sub> O | 70.9 <sup>S11</sup>                              | 69.9                                               | 110.9                                            | 82.5                                             | 8.9                                   |
| 153H | <i>p</i> -CH <sub>3</sub>   | 71.1 <sup>S11</sup>                              | 70.1                                               | 111.1                                            | 82.7                                             | 8.8                                   |
| 154H | <i>p</i> -H                 | 71.3 <sup>S11</sup>                              | 70.3                                               | 111.3                                            | 82.9                                             | 8.6                                   |
| 155H | <i>p</i> -Cl                | 71.7 <sup>S11</sup>                              | 70.7                                               | 111.7                                            | 83.3                                             | 8.3                                   |
| 156H | <i>p</i> -NO <sub>2</sub>   | 72.5 <sup>S11</sup>                              | 71.5                                               | 112.5                                            | 84.1                                             | 7.7                                   |
| 157H | <i>p</i> -CH <sub>3</sub> O | 71.8 <sup>S11</sup>                              | 70.8                                               | 111.8                                            | 83.4                                             | 8.2                                   |
| 158H | <i>p</i> -CH <sub>3</sub>   | 71.9 <sup>S11</sup>                              | 70.9                                               | 111.9                                            | 83.5                                             | 8.2                                   |
| 159H | <i>p</i> -H                 | 72.0 <sup>S11</sup>                              | 71.0                                               | 112.0                                            | 83.6                                             | 8.1                                   |
| 160H | <i>p</i> -Cl                | 72.1 <sup>S11</sup>                              | 71.1                                               | 112.1                                            | 83.7                                             | 8.0                                   |
| 161H | <i>p</i> -NO <sub>2</sub>   | 72.5 <sup>S11</sup>                              | 71.5                                               | 112.5                                            | 84.1                                             | 7.7                                   |
| 162H | <i>p</i> -CH <sub>3</sub> O | 73.1 <sup>S11</sup>                              | 72.1                                               | 113.1                                            | 84.7                                             | 7.3                                   |
| 163H | <i>p</i> -CH <sub>3</sub>   | 73.2 <sup>S11</sup>                              | 72.2                                               | 113.2                                            | 84.8                                             | 7.2                                   |

| XH   | G or R                                | $\Delta G_{\text{H-D}}^{\text{SI},a}$<br>(XH) <sup>SI,a</sup> | $\Delta G_{\text{PH-}}^{\text{SI},b}$<br>(XH/HClO <sub>4</sub> ) <sup>b</sup> | $\Delta G_{\text{PH-}}^{\text{SI},c}$<br>(XH/PhOH) <sup>c</sup> | $\Delta G_{\text{PH-}}^{\text{SI},d}$<br>(XH/TsOH) <sup>d</sup> | pK <sub>a</sub> (HB <sub>S</sub> ) <sup>e</sup> |
|------|---------------------------------------|---------------------------------------------------------------|-------------------------------------------------------------------------------|-----------------------------------------------------------------|-----------------------------------------------------------------|-------------------------------------------------|
| 164H | <i>p</i> -H                           | 73.4 <sup>SI1</sup>                                           | 72.4                                                                          | 113.4                                                           | 85.0                                                            | 7.1                                             |
| 165H | <i>p</i> -Cl                          | 73.5 <sup>SI1</sup>                                           | 72.5                                                                          | 113.5                                                           | 85.1                                                            | 7.0                                             |
| 166H | <i>p</i> -NO <sub>2</sub>             | 74.1 <sup>SI1</sup>                                           | 73.1                                                                          | 114.1                                                           | 85.7                                                            | 6.6                                             |
| 167H | <i>p</i> -CH <sub>3</sub> O           | 72.0 <sup>SI1</sup>                                           | 71.0                                                                          | 112.0                                                           | 83.6                                                            | 8.1                                             |
| 168H | <i>p</i> -CH <sub>3</sub>             | 72.0 <sup>SI1</sup>                                           | 71.0                                                                          | 112.0                                                           | 83.6                                                            | 8.1                                             |
| 169H | <i>p</i> -H                           | 72.2 <sup>SI1</sup>                                           | 71.2                                                                          | 112.2                                                           | 83.8                                                            | 8.0                                             |
| 170H | <i>p</i> -Cl                          | 72.4 <sup>SI1</sup>                                           | 71.4                                                                          | 112.4                                                           | 84.0                                                            | 7.8                                             |
| 171H | <i>p</i> -NO <sub>2</sub>             | 72.9 <sup>SI1</sup>                                           | 71.9                                                                          | 112.9                                                           | 84.5                                                            | 7.4                                             |
| 172H | <i>p</i> -CH <sub>3</sub> O           | 66.4 <sup>SI2</sup>                                           | 65.4                                                                          | 106.4                                                           | 78.0                                                            | 12.2                                            |
| 173H | <i>p</i> -CH <sub>3</sub>             | 67.5 <sup>SI2</sup>                                           | 66.5                                                                          | 107.5                                                           | 79.1                                                            | 11.4                                            |
| 174H | <i>p</i> -H                           | 68.1 <sup>SI2</sup>                                           | 67.1                                                                          | 108.1                                                           | 79.7                                                            | 10.9                                            |
| 175H | <i>p</i> -Cl                          | 69.2 <sup>SI2</sup>                                           | 68.2                                                                          | 109.2                                                           | 80.8                                                            | 10.1                                            |
| 176H | <i>p</i> -CF <sub>3</sub>             | 70.9 <sup>SI2</sup>                                           | 69.9                                                                          | 110.9                                                           | 82.5                                                            | 8.9                                             |
| 177H | <i>m</i> -CH <sub>3</sub> O           | 69.0 <sup>SI2</sup>                                           | 68.0                                                                          | 109.0                                                           | 80.6                                                            | 10.3                                            |
| 178H | (H, H)                                | 71.8 <sup>SI3</sup>                                           | 70.8                                                                          | 111.8                                                           | 83.4                                                            | 8.2                                             |
| 179H | (CH <sub>3</sub> O, H)                | 72.1 <sup>SI3</sup>                                           | 71.1                                                                          | 112.1                                                           | 83.7                                                            | 8.0                                             |
| 180H | (CH <sub>3</sub> , H)                 | 70.9 <sup>SI3</sup>                                           | 69.9                                                                          | 110.9                                                           | 82.5                                                            | 8.9                                             |
| 181H | (Cl, H)                               | 74.9 <sup>SI3</sup>                                           | 73.9                                                                          | 114.9                                                           | 86.5                                                            | 6.0                                             |
| 182H | (F, H)                                | 74.5 <sup>SI3</sup>                                           | 73.5                                                                          | 114.5                                                           | 86.1                                                            | 6.3                                             |
| 183H | (Br, H)                               | 74.3 <sup>SI3</sup>                                           | 73.3                                                                          | 114.3                                                           | 85.9                                                            | 6.4                                             |
| 184H | (CH <sub>3</sub> O, CH <sub>3</sub> ) | 69.3 <sup>SI3</sup>                                           | 68.3                                                                          | 109.3                                                           | 80.9                                                            | 10.1                                            |
| 185H | (H, CH <sub>3</sub> )                 | 71.1 <sup>SI3</sup>                                           | 70.1                                                                          | 111.1                                                           | 82.7                                                            | 8.8                                             |
| 186H | (H, Cl)                               | 74.3 <sup>SI3</sup>                                           | 73.3                                                                          | 114.3                                                           | 85.9                                                            | 6.4                                             |
| 187H | (H, F)                                | 72.5 <sup>SI3</sup>                                           | 71.5                                                                          | 112.5                                                           | 84.1                                                            | 7.7                                             |
| 188H | (H, Br)                               | 73.1 <sup>SI3</sup>                                           | 72.1                                                                          | 113.1                                                           | 84.7                                                            | 7.3                                             |
| 189H | -                                     | 76.2 <sup>SI4</sup>                                           | 75.2                                                                          | 116.2                                                           | 87.8                                                            | 5.0                                             |
| 190H | -                                     | 95.6 <sup>SI4</sup>                                           | 94.6                                                                          | 135.6                                                           | 107.2                                                           | -9.1                                            |
| 191H | -                                     | 91.3 <sup>SI4</sup>                                           | 90.3                                                                          | 131.3                                                           | 102.9                                                           | -6.0                                            |
| 192H | <i>p</i> -CH <sub>3</sub> O           | 90.2 <sup>SI4</sup>                                           | 89.2                                                                          | 130.2                                                           | 101.8                                                           | -5.2                                            |
| 193H | <i>p</i> -CH <sub>3</sub>             | 90.6 <sup>SI4</sup>                                           | 89.6                                                                          | 130.6                                                           | 102.2                                                           | -5.5                                            |
| 194H | <i>p</i> -H                           | 91.6 <sup>SI4</sup>                                           | 90.6                                                                          | 131.6                                                           | 103.2                                                           | -6.2                                            |
| 195H | <i>p</i> -Cl                          | 92.5 <sup>SI4</sup>                                           | 91.5                                                                          | 132.5                                                           | 104.1                                                           | -6.9                                            |
| 196H | <i>p</i> -Br                          | 92.7 <sup>SI4</sup>                                           | 91.7                                                                          | 132.7                                                           | 104.3                                                           | -7.0                                            |
| 197H | <i>p</i> -CF <sub>3</sub>             | 93.5 <sup>SI4</sup>                                           | 92.5                                                                          | 133.5                                                           | 105.1                                                           | -7.6                                            |
| 198H | <i>m</i> -CH <sub>3</sub> O           | 91.8 <sup>SI4</sup>                                           | 90.8                                                                          | 131.8                                                           | 103.4                                                           | -6.4                                            |
| 199H | <i>m</i> -CH <sub>3</sub>             | 91.3 <sup>SI4</sup>                                           | 90.3                                                                          | 131.3                                                           | 102.9                                                           | -6.0                                            |
| 200H | <i>m</i> -CF <sub>3</sub>             | 93.1 <sup>SI4</sup>                                           | 92.1                                                                          | 133.1                                                           | 104.7                                                           | -7.3                                            |
| 201H | N(CH <sub>3</sub> ) <sub>2</sub>      | 90.2 <sup>SI4</sup>                                           | 89.2                                                                          | 130.2                                                           | 101.8                                                           | -5.2                                            |
| 202H | <i>p</i> -CH <sub>3</sub> O           | 99.6 <sup>SI4</sup>                                           | 98.6                                                                          | 139.6                                                           | 111.2                                                           | -12.0                                           |
| 203H | <i>p</i> -CH <sub>3</sub>             | 102.4 <sup>SI4</sup>                                          | 101.4                                                                         | 142.4                                                           | 114.0                                                           | -14.1                                           |
| 204H | <i>p</i> -H                           | 104.8 <sup>SI4</sup>                                          | 103.8                                                                         | 144.8                                                           | 116.4                                                           | -15.8                                           |
| 205H | <i>p</i> -Cl                          | 106.4 <sup>SI4</sup>                                          | 105.4                                                                         | 146.4                                                           | 118.0                                                           | -17.0                                           |

| XH   | G or R                           | $\Delta G_{\text{H}^- \text{D}}(\text{XH})^{\text{SI},a}$ | $\Delta G_{\text{PH}^-}(\text{XH}/\text{HClO}_4)^b$ | $\Delta G_{\text{PH}^-}(\text{XH}/\text{PhOH})^c$ | $\Delta G_{\text{PH}^-}(\text{XH}/\text{TsOH})^d$ | $\text{p}K_{\text{a}}(\text{HB}_\text{S})^e$ |
|------|----------------------------------|-----------------------------------------------------------|-----------------------------------------------------|---------------------------------------------------|---------------------------------------------------|----------------------------------------------|
| 206H | <i>p</i> -Br                     | 107.0 <sup>SI4</sup>                                      | 106.0                                               | 147.0                                             | 118.6                                             | -17.4                                        |
| 207H | <i>p</i> -CH <sub>3</sub> O      | 102.2 <sup>SI4</sup>                                      | 101.2                                               | 142.2                                             | 113.8                                             | -13.9                                        |
| 208H | <i>p</i> -CH <sub>3</sub>        | 103.4 <sup>SI4</sup>                                      | 102.4                                               | 143.4                                             | 115.0                                             | -14.8                                        |
| 209H | <i>p</i> -Cl                     | 106.5 <sup>SI4</sup>                                      | 105.5                                               | 146.5                                             | 118.1                                             | -17.1                                        |
| 210H | N(CH <sub>3</sub> ) <sub>2</sub> | 79.5 <sup>SI4</sup>                                       | 78.5                                                | 119.5                                             | 91.1                                              | 2.6                                          |
| 211H | <i>p</i> -CH <sub>3</sub> O      | 94.6 <sup>SI4</sup>                                       | 93.6                                                | 134.6                                             | 106.2                                             | -8.4                                         |
| 212H | <i>p</i> -CH <sub>3</sub>        | 100.2 <sup>SI4</sup>                                      | 99.2                                                | 140.2                                             | 111.8                                             | -12.5                                        |
| 213H | <i>p</i> -Cl                     | 108.5 <sup>SI4</sup>                                      | 107.5                                               | 148.5                                             | 120.1                                             | -18.5                                        |
| 214H | <i>p</i> -Br                     | 109.3 <sup>SI4</sup>                                      | 108.3                                               | 149.3                                             | 120.9                                             | -19.1                                        |
| 215H | -                                | 103.4 <sup>SI4</sup>                                      | 102.4                                               | 143.4                                             | 115.0                                             | -14.8                                        |
| 216H | -                                | 86.2 <sup>SI4</sup>                                       | 85.2                                                | 126.2                                             | 97.8                                              | -2.3                                         |

Note: <sup>a</sup> Most  $\Delta G_{\text{H}^- \text{D}}(\text{XH})$  are from *ref. SI(a)* and all the  $\Delta H_{\text{H}^- \text{D}}(\text{XH})$  are available from our recent review *ref. SI(b)*.  $\Delta G_{\text{H}^- \text{D}}(\text{XH}) = \Delta H_{\text{H}^- \text{D}}(\text{XH}) - 4.9$  kcal/mol; <sup>b</sup>  $\Delta G_{\text{PH}^-}(\text{XH}/\text{HClO}_4) = \Delta G_{\text{H}^- \text{D}}(\text{XH}) + 1.37\text{p}K_{\text{a}}(\text{HClO}_4)$ ; <sup>c</sup>  $\Delta G_{\text{PH}^-}(\text{XH}/\text{PhOH}) = \Delta G_{\text{H}^- \text{D}}(\text{XH}) + 1.37\text{p}K_{\text{a}}(\text{PhOH})$ ; <sup>d</sup>  $\Delta G_{\text{PH}^-}(\text{XH}/\text{TsOH}) = \Delta G_{\text{H}^- \text{D}}(\text{XH}) + 1.37 \text{p}K_{\text{a}}(\text{TsOH})$ ; <sup>e</sup>  $\text{p}K_{\text{a}}(\text{HB}_\text{S}) = [\Delta G_{\text{PH}^-}(\text{HEH}) - \Delta G_{\text{H}^- \text{D}}(\text{XH})]/1.37$ . The unit of  $\Delta G_{\text{H}^- \text{D}}(\text{XH})$ ,  $\Delta G_{\text{PH}^-}(\text{XH}/\text{HClO}_4)$ ,  $\Delta G_{\text{PH}^-}(\text{XH}/\text{PhOH})$ ,  $\Delta G_{\text{PH}^-}(\text{XH}/\text{TsOH})$  is kcal/mol.

## References

- S1 (a) X.-Q. Zhu, F.-H. Deng, J.-D. Yang, X.-T. Li, Q. Chen, N.-P. Lei, F.-K. Meng, X.-P. Zhao, S.-H. Han, E.-J. Hao and Y.-Y. Mu, A classical but new kinetic equation for hydride transfer reactions, *Org. Biomol. Chem.*, 2013, **11**, 6071-6089; (b) G.-B. Shen, B.-C. Qian, Y.-H. Fu and X.-Q. Zhu, Thermodynamics of the elementary steps of organic hydride chemistry determined in acetonitrile and their applications, *Org. Chem. Front.*, 2022, DOI: 10.1039/D2QO01310J.
- S2 X.-Q. Zhu, L. Cao, Y. Liu, Y. Yang, J.-Y. Lu, J.-S. Wang and J.-P. Cheng, Thermodynamics and kinetics of the hydride-transfer cycles for 1-aryl-1,4-dihydronicotinamide and its 1,2-dihydroisomer, *Chem. Eur. J.*, 2003, **9**, 3937-3945.
- S3 X.-Q. Zhu, Y. Tan and C.-T. Cao, Thermodynamic diagnosis of the properties and mechanism of dihydropyridine-type compounds as hydride source in acetonitrile with “Molecule ID Card”, *J. Phys. Chem. B*, 2010, **114**, 2058-2075.
- S4 X.-Q. Zhu, Y.-Y. Mu and X.-T. Li, What are the differences between ascorbic acid and NADH as hydride and electron sources in vivo on thermodynamics, kinetics, and mechanism? *J. Phys. Chem. B*, 2011, **115**, 14794-14811.
- S5 H. Zhao, Y. Li and X.-Q. Zhu, Thermodynamic parameters of elementary steps for 3,5-disubstituted 1,4-dihydropyridines to release hydride anions in acetonitrile, *ACS Omega*, 2018, **3**, 13598-13608.
- S6 X.-Q. Zhu, H.-R. Li, Q. Li, T. Ai, J.-Y. Lu, Y. Yang and J.-P. Cheng, Determination of the C4-H bond dissociation energies of NADH models and their radical cations in acetonitrile, *Chem. Eur. J.*, 2003, **9**, 871-880.
- S7 G.-B. Shen, Y.-H. Fu and X.-Q. Zhu, Thermodynamic network cards of hantzsch ester,

- benzothiazoline, and dihydrophenanthridine releasing two hydrogen atoms or ions on 20 elementary steps, *J. Org. Chem.*, 2020, **85**, 12535-12543.
- S8 X.-Q. Zhu, M.-T. Zhang, A. Yu, C.-H. Wang and J.-P. Cheng, Hydride, hydrogen atom, proton, and electron transfer driving forces of various five-membered heterocyclic organic hydrides and their reaction intermediates in acetonitrile, *J. Am. Chem. Soc.*, 2008, **130**, 2501-2516.
- S9 X. Han, W. Hao, X.-Q. Zhu and V. D. Parker, A thermodynamic and kinetic study of hydride transfer of a caffeine derivative, *J. Org. Chem.*, 2012, **77**, 6520-6529.
- S10 N.-P. Lei, Y.-H. Fu and X.-Q. Zhu, Elemental step thermodynamics of various analogues of indazolium alkaloids to obtaining hydride in acetonitrile, *Org. Biomol. Chem.*, 2015, **13**, 11472-11485.
- S11 F.-K. Meng and X.-Q. Zhu, Elemental step thermodynamics of dihydropyrimidine: a new class of organic hydride donors, *Org. Biomol. Chem.*, 2017, **15**, 197-206.
- S12 X.-Q. Zhu, X.-T. Li, S.-H. Han and L.-R. Mei, Conversion and origin of normal and abnormal temperature dependences of kinetic isotope effect in hydride transfer reactions, *J. Org. Chem.*, 2012, **77**, 4774-4783.
- S13 K. Xia, G.-B. Shen and X.-Q. Zhu, Thermodynamics of various F420 coenzyme models as sources of electrons, hydride ions, hydrogen atoms and protons in acetonitrile, *Org. Biomol. Chem.*, 2015, **13**, 6255-6268.
- S14 X.-Q. Zhu, Z. Dai, A. Yu, S. Wu and J.-P. Cheng, Driving forces for the mutual conversions between phenothiazines and their various reaction intermediates in acetonitrile, *J. Phys. Chem. B*, 2008, **112**, 11694-11707.
